# Supplementary material
Source: MDPI journal article supplement (https://www.mdpi.com/2673-4060/2/1/3)
Supplement: s1 [file s1]

## Sheet: Citation
	Citation:
	Delgado Ramos, G.C. 2021. Mexico's and MVMA’s Metabolic Estimation Data. Supplementary material of the paper: Delgado Ramos, G.C. Climate-Environmental Governance in the Mexico Valley Metropolitan Area. World. 2(1): 32-48. Online: https://www.mdpi.com/2673-4060/2/1/3/s1

## Sheet: MVMA data
CVEGEO	Municipality	Administrative area (km2)	Population 2015				Population 2030		Average Urban Density (AUD)				Residential density, 2015 (buildings per km2)	Residential density by 2050; based on 2015 per capita bulding density (buildings per km2)	Total GDP - 2018 (millions of MX pesos, year)	GDP per capita- 2018 (millions of MX pesos/inhabitant, year)	Economic density (millions /km2)	Poverty (percentage, 2015)	Unemployment, 2015 (population of 12 years old or more, economically inactive)	Population with basic education or not educated (percentage, 2015)	Población afiliada a servicios médicos - 2015			Vehicle fleet		Total municipal electrical energy consumption (2018)		Elctrical energy per capita consumption - 2018 (kwh/inhabitant, year)	Per cápita domestic sales of petroleum products			Per capita water endowment - 2018 (liters/inhabitant)	Total water consumption - 2018 (liters/inhabitant, per day); it includes all types of formal provisions.	Total Domestic Material Consumption (DMC) - 2015 (tons, years)	DMC per capita 2015 (tons, year)	Total DMC - 2050 (lower value based on population increase) (tons, year)	Total DMC - 2050 (high value, based on real GDP increase) (tons, year)	Total DMC - 2050 (average lower & higher values) (tons, year)	DMC per capita 2050 (average lower & higher values) (tons, year)	Increase of DMC 2015 - 2050 (%)	DMC/residential density (2015)	DMC/residential density (2050)	Wastewater, 2015 (liters per second).	CO2 emissions - 2016 (tons/year)	Total CO2 emissions, adjusted - 2016		Municipal solid waste (total) – 2014 (tons daily)	Municipal solid waste per capita (kg daily)	Degree of climate vulnerability (as officially recognized)
			Total	Urban (more than 15 thousand inhabitants)	Mixed (between 2,500 and 14,999 inhabitants)	Rural (less than 2,499 inhabitants)		Population projection 2050	2000	2015	2030	2050									Population affiliated to health services	Popular insurance	Private insurance	2018	Motorization rate	KWh	Mejoules		Gasoline (MJ/year, 2019; does not include ilegal sales of gasoline)	Diesel (MJ/year, 2019; does not include ilegal sales of gasoline)	Total consumption of liquid fuels (MJ/year, 2019)															CO2 emissions adjusted per capita (kg daily)
9002	Azcapotzalco	33.3	400161	400161	0	0	376228	342865	205.4	189	177.696	161.938	3571	3059.69	204890	0.512019	6152.85	22.9	4.3	38.5	84.1	19.1	6.8	311310	0.77	825675907	2.97243e+09	2063.36	6.11804e+09	1.36272e+09	7.48076e+09	n.a.	n.a.	4.39082e+06	10.9726	3.76212e+06	7.06769e+06	5.41491e+06	15.7931	60.9654	1229.58	1769.76	73.46	987321	990099	6.77877	517	1.29198	Baja
9003	Coyoacán	54	608479	608479	0	0	563976	513963	194.3	194.4	180.182	164.204	3449	2913.26	160059	0.263048	2964.06	26.9	3.5	29.9	77.8	19.3	13.2	498273	0.81	1041571592	3.74966e+09	1711.76	9.79234e+09	2.18113e+09	1.19735e+10	n.a.	n.a.	6.67661e+06	10.9726	5.63952e+06	1.05947e+07	8.11709e+06	15.7931	58.6831	1935.81	2786.25	50.14	1.50131e+06	1.50553e+06	6.77877	810	1.33119	Muy Baja
9004	Cuajimalpa de Morelos	80.95	199224	196361	0	2863	191950	174928	84.6	89.5	86.2322	78.5852	2954	2593.75	189706	0.952223	2343.49	35.1	2.7	40.9	79.8	27.2	30	157039	0.78	513214360	1.84757e+09	2576.07	3.08622e+09	6.87418e+08	3.77364e+09	n.a.	n.a.	2.17024e+06	10.8935	1.90557e+06	3.5799e+06	2.74274e+06	15.6792	64.9538	734.679	1057.44	16.51	491547	489388	6.73006	186	0.933622	Baja
9005	Gustavo A. Madero	87.08	1164477	1164477	0	0	1.10367e+06	1.0058e+06	211.7	200.2	189.745	172.919	4380	3783.14	88406.7	0.0759196	1015.23	23.5	4.4	43.7	79.2	25.8	5.2	588619	0.5	1197667217	4.3116e+09	1028.5	1.15679e+10	2.57661e+09	1.41445e+10	n.a.	n.a.	1.27774e+07	10.9726	1.10362e+07	2.07331e+07	1.58847e+07	15.7931	62.2645	2917.21	4198.8	48.36	2.87312e+06	2.88121e+06	6.77877	1735	1.48994	Muy Baja
9006	Iztacalco	23.3	390348	390348	0	0	351418	320255	226.9	210.4	189.416	172.619	4726	3877.37	59788.8	0.153168	2566.04	29.4	4.5	37.6	78.3	22.6	5.1	253685	0.65	485664692	1.74839e+09	1244.18	4.98556e+09	1.11047e+09	6.09604e+09	n.a.	n.a.	4.28314e+06	10.9726	3.51403e+06	6.60162e+06	5.05783e+06	15.7931	54.1303	906.293	1304.45	32.01	963109	965819	6.77877	480	1.22967	Muy Baja
9007	Iztapalapa	116.67	1827868	1827868	0	0	1.75383e+06	1.5983e+06	211.7	215.4	206.675	188.348	4581	4005.67	148839	0.0814275	1275.72	27.5	4.8	49.4	75.6	37.7	3.4	773593	0.42	1576360270	5.6749e+09	862.404	1.52031e+10	3.38631e+09	1.85894e+10	n.a.	n.a.	2.00565e+07	10.9726	1.75376e+07	3.29469e+07	2.52422e+07	15.7931	64.2704	4378.19	6301.63	76.78	4.50991e+06	4.5226e+06	6.77877	2245	1.22821	Baja
9008	La Magdalena Contreras	63.37	243886	243231	0	655	235161	214308	151.6	162.3	156.494	142.616	5848	5138.76	14220.7	0.058309	224.408	25.5	4.7	49.4	79.4	29.5	10.8	132052	0.54	128013325	460847970	524.89	2.59516e+09	5.78041e+08	3.1732e+09	n.a.	n.a.	2.67246e+06	10.9578	2.34835e+06	4.41171e+06	3.38003e+06	15.7718	65.0804	456.987	657.752	8.57	601742	602625	6.76967	262	1.07427	Baja
9009	Milpa Alta	283.7	137927	109711	11506	16710	139240	126893	36.8	47.3	47.7504	43.5159	1200	1104	2302.26	0.0166919	8.11512	30.2	3.6	59.4	80.6	68	2	55756	0.4	45065397	1.62235e+08	326.734	1.09575e+09	2.44065e+08	1.33981e+09	n.a.	n.a.	1.38971e+06	10.0757	1.27853e+06	2.4019e+06	1.84021e+06	14.5021	72.835	1158.09	1666.86	1.08	340308	313476	6.22677	120	0.870025	Alta
9010	Álvaro Obregón	81.1	749982	749612	0	370	704630	642145	193	193.5	181.799	165.677	3503	2999.32	564719	0.752977	6963.25	27.9	3	44.8	79.5	25.8	11.5	434976	0.57	1122970189	4.04269e+09	1497.33	8.5484e+09	1.90405e+09	1.04524e+10	n.a.	n.a.	8.22723e+06	10.9699	7.04427e+06	1.32337e+07	1.0139e+07	15.7892	60.8521	2348.62	3380.43	51.25	1.85044e+06	1.85519e+06	6.7771	677	0.902688	Baja a Muy Baja
9011	Tláhuac	85.34	361593	353397	4246	3950	364056	331772	127.1	135.8	136.725	124.601	4582	4204.12	14396.5	0.0398142	168.696	23.1	4.9	49.5	83.3	47.3	4.6	135607	0.37	199744152	7.19079e+08	552.4	2.66503e+09	5.93603e+08	3.25863e+09	n.a.	n.a.	3.93418e+06	10.8801	3.60972e+06	6.78139e+06	5.19555e+06	15.66	72.3711	858.616	1235.82	9.8	892162	887159	6.72184	358	0.990063	Media
9012	Tlalpan	312	677104	665498	2589	9017	648202	590720	119.3	119.9	114.782	104.603	3817	3330.03	160792	0.23747	515.359	26.2	3.9	40.7	75.9	33.6	9.1	405755	0.59	803260439	2.89174e+09	1186.32	7.97413e+09	1.77614e+09	9.75027e+09	n.a.	n.a.	7.37282e+06	10.8888	6.4322e+06	1.20838e+07	9.25801e+06	15.6724	63.897	1931.57	2780.16	52.98	1.67062e+06	1.66257e+06	6.72715	868	1.28193	Baja
9013	Xochimilco	125.17	415933	408811	0	7122	406278	370250	88	93.8	91.6227	83.4977	1544	1374.42	32151.6	0.0773	256.864	23.8	4	47.3	76.3	41.2	3.9	184750	0.44	288032436	1.03692e+09	692.497	3.63081e+09	8.0872e+08	4.43953e+09	n.a.	n.a.	4.52465e+06	10.8783	4.0277e+06	7.56661e+06	5.79716e+06	15.6574	67.2308	2930.47	4217.9	15.05	1.02624e+06	1.02031e+06	6.72073	443	1.06508	Muy Baja
9014	Benito Juárez	26.63	417416	417416	0	0	357710	325988	149.7	157.1	134.629	122.69	5989	4677.22	308479	0.73902	11583.9	26.6	3.2	16.8	81.7	9.2	18.1	519475	1.24	1129800169	4.06728e+09	2706.65	1.0209e+10	2.27394e+09	1.2483e+10	n.a.	n.a.	4.58015e+06	10.9726	3.57695e+06	6.71981e+06	5.14838e+06	15.7931	46.716	764.76	1100.74	69.51	1.02989e+06	1.03279e+06	6.77877	712	1.70573	Muy Baja
9015	Cuauhtémoc	32.44	532553	532553	0	0	497453	453339	214.7	215.6	201.39	183.531	5786	4925.37	1.30072e+06	2.44242	40096.1	31.5	4.4	33.1	75.6	20.9	10.6	534644	1	1583450868	5.70042e+09	2973.32	1.05071e+10	2.34034e+09	1.28475e+10	321.55	154.38	5.8435e+06	10.9726	4.97432e+06	9.34498e+06	7.15965e+06	15.7931	59.9208	1009.94	1453.63	153.35	1.31397e+06	1.31767e+06	6.77877	1316	2.47112	Muy Baja
9016	Miguel Hidalgo	46.99	364439	364439	0	0	354616	323170	174.9	186.7	181.668	165.558	3197	2834.97	946700	2.59769	20146.8	32.3	3	25	82.1	12.1	25.6	526632	1.43	1740209917	6.26476e+09	4775.04	1.03497e+10	2.30527e+09	1.26549e+10	n.a.	n.a.	3.99885e+06	10.9726	3.54602e+06	6.66171e+06	5.10386e+06	15.7931	66.5905	1250.81	1800.32	158.66	899184	901714	6.77877	827	2.26924	Muy Baja
9017	Venustiano Carranza	33.42	427263	427263	0	0	391368	356662	222.8	209.5	191.9	174.882	3759	3137.86	84117.4	0.196875	2516.98	26.7	4.5	40.1	80.9	28.4	4.9	289303	0.95	739210653	2.66116e+09	1730.11	5.68555e+09	1.26639e+09	6.95193e+09	n.a.	n.a.	4.6882e+06	10.9726	3.91352e+06	7.35211e+06	5.63281e+06	15.7931	56.8217	1247.19	1795.11	23.95	1.05419e+06	1.05716e+06	6.77877	857	2.00579	Muy Baja
13069	Tizayuca	92.5	119442	75354	35708	8380	158151	176577	35.9	57.5	76.1348	85.0049	7613	11254.6	25397.2	0.212632	274.565	34.4395	2.8	56.1	77.6	31.8	4.5	21479	0.18	217699538	7.83718e+08	1822.64	4.22118e+08	9.40216e+07	5.16139e+08	n.a.	n.a.	1.16611e+06	9.76298	1.72391e+06	3.23862e+06	2.48127e+06	14.0521	177.728	153.173	220.466	n.a.	874297	913760	20.9596	237.5	1.98841	Baja
15002	Acolman	87.08	152506	114657	33904	3945	234007	245959	32.5	78.8	120.912	127.087	5138	8286.48	11765.4	0.0771471	135.11	56.1856	4.4	58	79.12	50.4	1.9	41587	0.27	92148330	331733988	604.228	8.17291e+08	1.82042e+08	9.99333e+08	n.a.	n.a.	1.5583e+06	10.218	2.5132e+06	4.72141e+06	3.61731e+06	14.7069	202.985	303.289	436.531	n.a.	507285	497260	8.93313	36	0.236056	Media
15009	Amecameca	172.9	50904	33312	7809	9783	60999.2	64114.8	45.4	45.9	55.0028	57.8121	1799	2265.88	1605.9	0.0315476	9.28803	57.5696	5.5	57.8	82.18	57.8	6.2	14407	0.28	20354039	7.32745e+07	399.851	2.83135e+08	6.30648e+07	3.46199e+08	418.22	145.12	483167	9.49173	608560	1.14327e+06	875914	13.6617	136.62	268.575	386.566	n.a.	169323	154229	8.30083	47	0.923307	Alta
15010	Apaxco	79.91	29347	0	22038	7309	36113.3	37957.9	41.4	40.3	49.5917	52.1246	1070	1383.95	5051.1	0.172116	63.2099	46.0704	3.2	62.8	75	44	4.9	13870	0.47	59434879	2.13966e+08	2025.25	2.72581e+08	6.07142e+07	3.33295e+08	n.a.	n.a.	221073	7.53306	285939	537178	411558	10.8425	142.987	206.61	297.379	n.a.	97617.8	70648.9	6.59551	22	0.749651	Media
15011	Atenco	87.58	63392	18996	39907	3489	83897.2	88182.3	48.2	52.1	68.9526	72.4744	8101	11269	886.3	0.0139813	10.1199	59.3383	4.2	64.2	79.5	67.7	1.5	16316	0.26	19157289	6.89662e+07	302.204	3.20651e+08	7.14212e+07	3.92073e+08	150	150	555495	8.76286	772729	1.45168e+06	1.11221e+06	12.6126	161.331	68.5712	98.696	n.a.	210863	177369	7.66566	70	1.10424	Media
15013	Atizapán de Zaragoza	90.18	523296	522466	0	830	620111	651784	127.8	130.8	154.999	162.916	2836	3532.34	51941.5	0.0992584	575.976	34.2	4.8	48.5	73.3	28.1	7.9	304034	0.58	528895942	1.90403e+09	1010.7	5.97505e+09	1.33087e+09	7.30592e+09	247.18		5.73736e+06	10.9639	7.14609e+06	1.3425e+07	1.02855e+07	15.7806	133.992	2023.05	2911.81	31.5	1.74065e+06	1.8303e+06	9.58257	600	1.14658	Alta
15015	Atlautla	165.51	30945	0	27963	2982	38293.6	40249.5	37.7	37.7	46.6527	49.0355	1125	1463.26	977.1	0.0315754	5.90357	76.1	4.4	69.6	80.52	81.2	4.7	5156	0.16	5632791	2.0278e+07	182.026	1.01329e+08	2.25697e+07	1.23898e+08	n.a.	n.a.	246122	7.95353	320125	601402	460763	11.4477	144.351	218.775	314.888	n.a.	102933	78630.7	6.96159	32	1.03409	Media
15016	Axapusco	269.01	27709	0	16185	11524	35038.5	36828.1	26.3	23.6	29.8426	31.3668	574	762.904	251.4	0.00907286	0.934538	59.3	3.3	69.4	88.7	85.6	0.6	8521	0.3	10474729	3.7709e+07	378.026	1.6746e+08	3.72996e+07	2.04759e+08	n.a.	n.a.	196003	7.07363	260508	489402	374955	10.1812	149.691	341.469	491.484	n.a.	92169.2	62660	6.19551	9	0.324804	Baja
15017	Ayapango	36.63	9863	0	4103	5760	13641	14337.7	29.9	29	40.1083	42.1569	1162	1689.18	491.5	0.0498327	13.418	46.5	4.7	62.2	86	74.1	1	2252	0.22	16831682	6.05941e+07	1706.55	4.42576e+07	9.85785e+06	5.41154e+07	n.a.	n.a.	65201.5	6.61071	94782.4	178062	136422	9.51495	173.096	56.1114	80.7624	n.a.	32807.6	20852.8	5.79246	5	0.506945	Baja
15020	Coacalco de Berriozábal	35.71	284462	284355	0	107	338666	355964	185.5	161.2	191.917	201.719	3895	4874.04	16832.2	0.0591721	471.358	26.7	4.8	37.4	79.2	20.4	4.3	194483	0.68	176218461	6.34386e+08	619.48	3.82209e+09	8.51325e+08	4.67342e+09	411.32	194.76	3.1207e+06	10.9706	3.90512e+06	7.33633e+06	5.62073e+06	15.7902	135.086	801.208	1153.2	n.a.	946214	995548	9.58837	280	0.984314	Baja
15022	Cocotitlán	10.45	14414	0	11117	3297	15026.7	15794.2	46.1	52.3	54.5231	57.3079	1980	2169.59	177.1	0.0122867	16.9474	42.6	3.3	56.2	83.5	54.3	2.3	4488	0.31	42402095	1.52648e+08	2941.73	8.82007e+07	1.96457e+07	1.07846e+08	n.a.	n.a.	109388	7.58902	119862	225179	172521	10.923	105.853	55.2465	79.5175	n.a.	47945.7	34956	6.64423	7.5	0.520327	Baja
15023	Coyotepec	46.75	41810	38218	2736	856	49777.1	52319.5	43.8	48.6	57.8609	60.8162	771	964.8	594	0.0142071	12.7059	44.9	3	63.3	74.7	39.2	1.5	11906	0.28	14573323	5.2464e+07	348.561	2.33983e+08	5.2117e+07	2.86101e+08	n.a.	n.a.	446517	10.6797	558754	1.0497e+06	804227	15.3715	135.086	579.14	833.569	n.a.	139074	142460	9.33511	25	0.597943	Baja
15024	Cuautitlán	42.5	149550	115798	26553	7199	204624	215075	111.9	125	171.033	179.768	1755	2523.95	18829.2	0.125906	443.04	26.2	3.4	39.1	83.5	19.5	5.5	67101	0.44	221567656	7.97644e+08	1481.56	1.31871e+09	2.93726e+08	1.61243e+09	120.17	120.17	1.52819e+06	10.2186	2.19776e+06	4.12881e+06	3.16328e+06	14.7078	170.177	870.762	1253.31	n.a.	497452	487651	8.93366	140	0.936142	Baja
15025	Chalco	229.64	343701	230084	100425	13192	449939	472920	85.2	96.5	126.328	132.781	1268	1744.72	23544.8	0.0685037	102.529	54.5	4.9	62	73.6	44.8	1.6	143038	0.41	238631802	8.59074e+08	694.301	2.81106e+09	6.26131e+08	3.4372e+09	184.29	92.15	3.4221e+06	9.95663	4.70869e+06	8.84596e+06	6.77733e+06	14.3308	158.495	2698.82	3884.47	n.a.	1.14326e+06	1.09212e+06	8.7056	250	0.727376	Baja
15028	Chiautla	20.13	29159	0	18796	10363	36111.7	37956.1	22.6	22.8	28.2365	29.6787	1817	2365.18	432.1	0.0148188	21.4655	52.8	4.1	58.2	79.5	70.7	3.2	11767	0.4	9652529	3.47491e+07	331.031	2.31252e+08	5.15086e+07	2.8276e+08	n.a.	n.a.	211118	7.24023	274811	516272	395542	10.421	144.542	116.19	167.235	n.a.	96992.4	67482.7	6.34055	30	1.02884	Alta
15029	Chicoloapan	42.09	204107	201619	0	2488	226984	238577	129.8	150.4	167.257	175.8	3347	3912.25	9964.5	0.04882	236.743	44.8	4.7	53.4	72.9	37.1	1.3	63217	0.3	92455624	3.3284e+08	452.976	1.24238e+09	2.76724e+08	1.5191e+09	n.a.	n.a.	2.22589e+06	10.9055	2.6018e+06	4.88786e+06	3.74483e+06	15.6965	119.592	665.039	957.206	n.a.	678927	710105	9.53173	30	0.146982	Media
15030	Chiconcuac	6.9	25543	24333	0	1210	31549.4	33160.8	50.8	51.4	63.4866	66.7292	3408	4424.38	933.7	0.036554	135.319	65.1	2.4	56.9	65.2	77.1	2	12100	0.47	11884499	4.27842e+07	465.274	2.37796e+08	5.29662e+07	2.90762e+08	n.a.	n.a.	273610	10.7117	355209	667312	511261	15.4176	143.892	80.2845	115.555	n.a.	84964.4	87293.3	9.36303	7.3	0.285793	Alta
15031	Chimalhuacán	55.05	679811	677521	0	2290	875798	920530	154.3	159.1	204.968	215.437	3693	5000.68	9184.6	0.0135105	166.841	61.5	4.3	67	74.6	63.6	2.4	172366	0.25	243259816	8.75735e+08	357.834	3.38743e+09	7.5451e+08	4.14195e+09	112.65	75.97	7.4467e+06	10.9541	1.00835e+07	1.89434e+07	1.45135e+07	15.7664	154.387	2016.44	2902.3	n.a.	2.26127e+06	2.37561e+06	9.57402	450	0.661949	Alta
15033	Ecatepec de Morelos	155.25	1677678	1676572	0	1106	2.0396e+06	2.14378e+06	177.5	164.6	200.109	210.33	3684	4707.5	135920	0.0810167	875.49	42.7	5.6	53.8	73.5	34.2	2.8	1052156	0.62	1511819217	5.44255e+09	901.138	2.06776e+10	4.60568e+09	2.52832e+10	227.89	133.52	1.84024e+07	10.969	2.35151e+07	4.41764e+07	3.38457e+07	15.7879	140.058	4995.23	7189.75	n.a.	5.58051e+06	5.87063e+06	9.58701	3000	1.78819	Media
15034	Ecatzingo	50.77	9414	0	7092	2322	13183.9	13857.3	9.1	11.2	15.6851	16.4862	2960	4357.08	115.7	0.0122902	2.2789	77.4	4.7	71.3	88.5	85.5	2.8	996	0.1	3702859	1.33303e+07	393.335	1.9574e+07	4.35986e+06	2.39338e+07	n.a.	n.a.	70978.5	7.53968	104479	196280	150379	10.852	176.534	23.9792	34.5138	n.a.	31314.1	22682.7	6.60127	6	0.637349	Alta
15035	Huehuetoca	161.71	128486	47330	72844	8312	173524	182387	81.4	76.8	103.721	109.018	1841	2613.31	10754	0.0836978	66.5018	39.8	4	55.9	83	33.5	1.5	25786	0.2	177263584	6.38149e+08	1379.63	5.06761e+08	1.12875e+08	6.19636e+08	298.61	126.7	1.16346e+06	9.05513	1.65154e+06	3.10265e+06	2.37709e+06	13.0333	166.675	631.971	909.609	n.a.	427387	371460	7.92071	130	1.01178	Baja
15036	Hueypoxtla	246.95	43784	0	34769	9015	53003.2	55710.3	18.3	20.2	24.4533	25.7023	909	1156.6	531.8	0.012146	2.15347	67.3	4.8	44.8	73.5	73.6	1.3	8880	0.2	8533198	3.07195e+07	194.893	1.74515e+08	3.88711e+07	2.13386e+08	191.29	191.29	335031	7.65191	426290	800848	613569	11.0136	139.037	368.571	530.493	n.a.	145640	107058	6.69898	20	0.456788	Alta
15037	Huixquilucan	143.52	267858	159963	80095	27800	318534	334804	90.6	100.4	119.395	125.493	1469	1836.15	40461.6	0.151056	281.923	30.8	2.6	44	77.3	34.9	26.3	157581	0.58	296571638	1.06766e+09	1107.2	3.09687e+09	6.89791e+08	3.78666e+09	603.62	185.92	2.56544e+06	9.5776	3.20662e+06	6.02409e+06	4.61536e+06	13.7853	134.817	1746.38	2513.61	n.a.	890984	818867	8.3756	300	1.12	Baja
15038	Isidro Fabela	80.02	11726	0	0	11726	14393.1	15128.2	15.7	17.6	21.6031	22.7065	499	643.781	174.1	0.0148473	2.17571	43.2	2.2	69.7	81.7	73.7	0.8	2242	0.19	2427819	8.74015e+06	207.046	4.40611e+07	9.81407e+06	5.38751e+07	n.a.	n.a.	64084.5	5.46516	82678.1	155323	119000	7.86613	142.372	128.426	184.846	n.a.	39004.5	20522.9	4.79509	3.5	0.298482	Baja
15039	Ixtapaluca	318.27	495563	457825	28785	8953	633645	666009	131.5	142.4	182.078	191.378	2788	3746.92	27927.5	0.0563551	87.7478	54.2	3.8	56	74.8	46.4	3.2	211280	0.42	350936128	1.26337e+09	708.156	4.15219e+09	9.24852e+08	5.07705e+09	198.79	196.43	5.30905e+06	10.7132	7.13507e+06	1.34043e+07	1.02697e+07	15.4197	152.479	1904.25	2740.83	n.a.	1.64841e+06	1.69382e+06	9.36428	54	0.108967	Baja
15044	Jaltenco	4.45	27825	16101	11724	0	32872.5	34551.5	186.2	157.7	186.307	195.823	3565	4426.81	342.4	0.0123055	76.9438	47.8	4.5	56.2	85	53.5	1.4	8600	0.3	10980918	3.95313e+07	394.642	1.69012e+08	3.76454e+07	2.06658e+08	312.19	312.19	273028	9.81235	339031	636918	487975	14.1231	133.279	76.5858	110.232	n.a.	92555.1	87139.3	8.57998	9	0.32345	Media
15046	Jilotzingo	124.8	19013	0	7339	11674	26518.1	27872.6	17.1	20.8	29.0105	30.4922	831	1218.22	137.5	0.00723189	1.10176	44.3	2.3	66.2	84.3	59.1	3	5920	0.31	9624568	3.46484e+07	506.21	1.16343e+08	2.59141e+07	1.42257e+08	n.a.	n.a.	124119	6.5281	181955	341828	261892	9.39604	175.404	149.361	214.978	n.a.	63243.5	39699.1	5.72054	10	0.525956	Baja
15050	Juchitepec	141.09	25436	17343	6780	1313	31993.2	33627.3	64.5	72.7	91.4416	96.112	1942	2567.39	746.2	0.0293364	5.28882	71.4	5.9	69.6	85.9	84.2	3	4228	0.16	6394797	2.30213e+07	251.407	8.30911e+07	1.85075e+07	1.01599e+08	n.a.	n.a.	253198	9.95432	334737	628851	481794	14.3275	148.363	130.38	187.659	n.a.	84608.5	80805.3	8.70359	12	0.471772	Baja
15053	Melchor Ocampo	32.48	57152	43909	11815	1428	75956.3	79835.9	56.5	65.9	87.5826	92.056	1910	2668.09	977.4	0.0171018	30.0924	46.9	3.5	58	77.6	48	3.5	18549	0.32	25476235	91714446	445.763	3.64536e+08	8.11959e+07	4.45731e+08	n.a.	n.a.	586707	10.2657	819574	1.53969e+06	1.17963e+06	14.7757	162.429	307.177	442.126	n.a.	190106	187217	8.97472	25	0.43743	Media
15057	Naucalpan de Juárez	155.7	844219	802131	19991	22097	1.03447e+06	1.08731e+06	205.3	192.8	236.249	248.315	3390	4366.12	279165	0.330679	1792.97	37.1	4.4	52	77.6	27.8	9.8	589156	0.69	1009288320	3633437952	1195.53	1.15784e+10	2.57896e+09	1.41574e+10	264.32	160.1	9.08655e+06	10.7633	1.1703e+07	2.19857e+07	1.68443e+07	15.4918	141.959	2680.4	3857.96	1736	2.80815e+06	2.89895e+06	9.40789	548.68	0.649926	Media
15058	Nezahualcóyotl	63.74	1039867	1034268	3081	2518	1.3342e+06	1.40235e+06	257.2	226.8	290.996	305.858	5544	7476.54	45094.4	0.0433655	707.474	38.7	4.4	51.4	73.9	40.9	2.9	786500	0.75	572633758	2.06148e+09	550.68	1.54567e+10	3.4428e+09	1.88996e+10	200		1.13877e+07	10.9511	1.53573e+07	2.88509e+07	2.21041e+07	15.7622	153.351	2054.06	2956.46	5411	3.45894e+06	3.63286e+06	9.57146	1200	1.15399	Alta
15059	Nextlalpan	54.51	39666	0	32749	6917	56950.5	59859.3	19.1	31.5	45.2261	47.5361	1082	1632.83	490.7	0.0123708	9.00202	55.1	3.8	62.6	76.1	59.6	0.9	9417	0.23	32746148	1.17886e+08	825.547	1.85068e+08	4.12217e+07	2.2629e+08	n.a.	n.a.	306963	7.73869	463233	870249	666741	11.1385	183.503	283.7	408.335	n.a.	131942	98082.5	6.77455	20	0.50421	Media
15060	Nicolás Romero	232.16	410118	315249	74283	20586	517003	543409	74.6	86.5	109.044	114.613	2377	3149.54	7593.3	0.0185149	32.7072	43.2	4.3	61.2	78.6	37.8	2	105897	0.25	175631734	6.32274e+08	428.247	2.08115e+09	4.63551e+08	2.5447e+09	313.87	156.93	4.18214e+06	10.1974	5.54136e+06	1.04102e+07	7.9758e+06	14.6773	148.922	1759.42	2532.37	n.a.	1.36419e+06	1.33455e+06	8.91523	160	0.390132	Baja
15061	Nopaltepec	87.28	8960	0	7495	1465	11626.1	12220	13.6	15.8	20.5015	21.5486	458	624.636	208.4	0.0232589	2.38772	56	2.4	65.6	92.1	84.1	2.3	3530	0.39	7353988	2.64744e+07	820.758	6.93736e+07	1.54521e+07	8.48257e+07	n.a.	n.a.	69607.1	7.76865	94932.5	178344	136639	11.1816	156.216	151.981	218.749	n.a.	29803.9	22240.8	6.80062	7.77	0.867188	Baja
15065	Otumba	143.77	35274	0	21647	13627	46723.3	49109.7	20.4	22	29.1408	30.6292	1311	1825.22	797.9	0.0226201	5.54984	63.3	3.2	68.4	87.8	85.3	2.3	21822	0.61	21704903	7.81377e+07	615.323	4.28858e+08	9.55231e+07	5.24381e+08	n.a.	n.a.	252388	7.15508	351384	660126	505755	10.2985	161.552	192.516	277.092	n.a.	117333	80680.2	6.26642	30	0.850485	Alta
15068	Ozumba	48.02	29114	17871	5899	5344	37132.4	39029	46.5	46.1	58.7966	61.7997	1185	1588.56	776.3	0.0266641	16.1662	70	4.5	63.1	76.7	79	3.6	7063	0.24	6518612	2.3467e+07	223.9	1.38806e+08	3.09174e+07	1.69723e+08	n.a.	n.a.	273781	9.40375	367019	689498	528259	13.535	151.843	231.039	332.539	n.a.	96842.7	87395.7	8.22423	24	0.824346	Baja
15069	Papalotla	3.59	3963	0	3895	68	5458.29	5737.07	17.6	19.4	26.7199	28.0846	3703	5360.68	108.9	0.0274792	30.3343	45.9	3.2	49.5	77.2	68.7	2	2213	0.55	3687661	1.32756e+07	930.523	4.34911e+07	9.68713e+06	5.31783e+07	n.a.	n.a.	32384.2	8.17164	46881.3	88073.3	67477.3	11.7616	171.964	8.7454	12.5874	n.a.	13182.2	10344.6	7.15149	3	0.757002	Alta
15070	La Paz	36.95	293725	197672	91489	4564	341992	359460	141.2	134.7	156.835	164.845	2998	3668.94	41533.2	0.141402	1124.04	54.4	4.1	60.9	74.5	54.9	3.4	93263	0.31	236267169	8.50562e+08	804.382	1.83286e+09	4.08247e+08	2.2411e+09	116.56	58.28	2.94586e+06	10.0293	3.60513e+06	6.77277e+06	5.18895e+06	14.4354	129.908	982.609	1414.29	n.a.	977026	940109	8.76888	138	0.469827	Baja
15075	San Martín de las Pirámides	70.3	26960	0	13899	13061	34247.5	35996.7	43.8	43	54.6232	57.4131	1827	2439.39	819.5	0.0303969	11.6572	49.5	3.6	59	84.8	76.8	2.3	9450	0.35	11103993	3.99744e+07	411.869	1.85717e+08	4.13662e+07	2.27083e+08	n.a.	n.a.	185615	6.88483	247831	465586	356708	9.90948	150.834	101.595	146.229	n.a.	89677.8	59348.6	6.03112	12	0.445104	Baja
15081	Tecámac	155.47	446008	426008	10526	9354	553582	581856	67.9	98.2	121.885	128.11	1791	2336.52	12226.9	0.0274141	78.6448	36.8	4.6	46.6	75.7	24.4	3.7	206770	0.46	345667105	1.2444e+09	775.024	4.06356e+09	9.0511e+08	4.96867e+09	150	146.72	4.81206e+06	10.7892	6.27775e+06	1.17937e+07	9.0357e+06	15.5291	145.086	2686.8	3867.17	n.a.	1.48357e+06	1.53521e+06	9.43045	404.63	0.907226	Baja
15083	Temamatla	28.42	12984	0	6527	6457	15359.5	16144	38.4	37.2	44.0059	46.2536	2070	2573.79	356.9	0.0274877	12.5581	40.2	3	60	84.6	43.1	6.6	3808	0.29	8209662	2.95548e+07	632.291	7.4837e+07	1.6669e+07	9.1506e+07	n.a.	n.a.	88933.3	6.84945	110577	207736	159157	9.85857	133.586	42.9629	61.8375	n.a.	43189	28436.5	6.00032	9	0.693161	Baja
15084	Temascalapa	177.31	38622	0	30175	8447	47542.9	49971.2	19.3	21.7	26.7123	28.0766	554	716.795	528.6	0.0136865	2.98122	58	3.2	69.5	83	72.9	1	7783	0.2	15646134	5.63261e+07	405.109	1.52956e+08	3.40691e+07	1.87025e+08	77.72	77.72	294169	7.61663	380612	715034	547823	10.9628	143.069	530.992	764.268	n.a.	128469	94002.7	6.66827	11	0.284812	Alta
15089	Tenango del Aire	38	12470	0	6973	5497	14295.4	15025.6	35.1	41	47.0018	49.4025	909	1095.29	78.3	0.00627907	2.06053	53.7	4.3	64.1	82.6	75.9	1.1	2823	0.22	2349369	8.45773e+06	188.402	5.54792e+07	1.23573e+07	6.78365e+07	449.23	224.62	87352.3	7.005	105254	197735	151495	10.0825	126.365	96.0972	138.315	n.a.	41479.3	27927.2	6.13575	10	0.801925	Media
15091	Teoloyucan	31.52	66518	54019	9488	3011	72500.8	76203.9	41.8	44.2	48.1755	50.6361	832	953.15	3422.2	0.0514477	108.572	52.1	4.1	60.6	72.1	49.2	0.6	25470	0.38	83643548	3.01117e+08	1257.46	5.00551e+08	1.11492e+08	6.12043e+08	238.04	238.04	687167	10.3305	787227	1.47892e+06	1.13307e+06	14.869	115.22	825.921	1188.77	n.a.	221261	219268	9.03114	34.28	0.515349	Alta
15092	Teotihuacán	82.66	56993	25078	23215	8700	72114.6	75797.9	35.3	37.1	46.9435	49.3412	733	974.854	2254.7	0.039561	27.2768	53.7	3.9	60.6	83.9	67.6	2.7	28647	0.5	31472652	1.13302e+08	552.22	5.62987e+08	1.25399e+08	6.88386e+08	n.a.	n.a.	513520	9.01023	682956	1.28303e+06	982994	12.9686	149.85	700.573	1008.35	n.a.	189577	163957	7.88161	67.18	1.17874	Media
15093	Tepetlaoxtoc	172.38	30680	0	19779	10901	37241.2	39143.4	13.1	15.5	18.8148	19.7758	740	944.136	342.2	0.0111538	1.98515	56	3.8	62.5	87.8	76.3	2.6	8866	0.28	60736950	218653020	1979.69	1.7424e+08	3.88098e+07	2.13049e+08	n.a.	n.a.	222137	7.24046	283416	532438	407927	10.4214	139.689	300.185	432.064	n.a.	102052	71005	6.34075	22	0.71708	Media
15094	Tepetlixpa	47.82	19843	0	14334	5509	24075.2	25304.9	33.9	32.2	39.0678	41.0632	513	654.205	384.3	0.019367	8.03639	68.4	4.9	68.7	71.3	76.1	2.9	3207	0.16	4161476	1.49813e+07	209.72	6.30258e+07	1.40382e+07	7.7064e+07	n.a.	n.a.	147917	7.45438	188632	354373	271502	10.7292	139.575	288.338	415.011	n.a.	66004.3	47273.1	6.527	10	0.503956	Alta
15095	Tepotzotlán	208.83	94198	40546	38376	15276	131253	137957	68	55.4	77.1928	81.1354	1216	1780.88	20307.5	0.215583	97.2442	38.4	4.2	58.2	75.7	35.2	5.6	32914	0.35	226635714	8.15889e+08	2405.95	6.46845e+08	1.44077e+08	7.90922e+08	n.a.	n.a.	843790	8.95762	1.23576e+06	2.32156e+06	1.77866e+06	12.8929	175.135	693.906	998.755	n.a.	313333	269413	7.83581	78	0.828043	Media
15096	Tequixquiac	123.32	36902	24679	10034	2189	45131.6	47436.7	16.9	18.7	22.8703	24.0384	1411	1813.81	757.6	0.0205301	6.14337	60.2	4.8	67.4	65.3	61.5	0.1	9724	0.26	19028458	6.85024e+07	515.648	1.91102e+08	4.25656e+07	2.33667e+08	94.96	94.96	365225	9.89716	469489	882002	675746	14.2452	141.496	258.841	372.556	n.a.	122748	116560	8.65382	13	0.352284	Alta
15099	Texcoco	422.53	240749	146781	77913	16055	317032	333224	46.9	45.9	60.4437	63.5309	815	1128.05	22434	0.0931842	53.0945	45.8	3	49.6	75.5	41.1	6.2	132784	0.55	240263666	8.64949e+08	997.984	2.60955e+09	5.81245e+08	3.19079e+09	150	75	2.33867e+06	9.71416	3.237e+06	6.08116e+06	4.65908e+06	13.9818	160.026	2869.54	4130.19	n.a.	800810	746440	8.49449	98.54	0.409306	Media
15100	Tezoyuca	11.03	41333	19884	18990	2459	54556.8	57343.3	30.9	37	48.8375	51.3319	1468	2036.63	1144.1	0.0276801	103.726	65.4	5.5	64	73.8	64.5	1.1	13111	0.31	19066267	6.86386e+07	461.284	2.57665e+08	5.73918e+07	3.15057e+08	n.a.	n.a.	387695	9.3798	537869	1.01046e+06	774166	13.5006	160.633	264.098	380.121	n.a.	137487	123761	8.20338	8.5	0.205647	Alta
15103	Tlalmanalco	158.57	47390	21443	17989	7958	59029.2	62044.2	51.2	53.5	66.6399	70.0435	1175	1538.34	1197.4	0.0252669	7.55124	45.6	4.5	56.6	84.2	46.4	1.7	13339	0.28	31098406	1.11954e+08	656.223	2.62146e+08	5.83898e+07	3.20535e+08	522.59	522.59	426627	9.00248	558551	1.04932e+06	803935	12.9575	145.957	363.087	522.599	n.a.	157635	136214	7.87486	46	0.970669	Baja
15104	Tlalnepantla de Baz	83.7	700734	689325	11306	103	784390	824454	174.2	155.4	173.952	182.837	3021	3554.38	185623	0.264898	2217.72	34.9	4.6	46.8	79.6	28.3	4.8	530282	0.75	1511313872	5.44073e+09	2156.76	1.04214e+10	2.32124e+09	1.27426e+10	248.55	112.55	7.65719e+06	10.9274	9.00912e+06	1.69249e+07	1.2967e+07	15.728	121.033	2534.65	3648.18	1497	2.33087e+06	2.44279e+06	9.55079	608.84	0.86886	Baja
15108	Tultepec	27.4	150182	147178	0	3004	105572	110964	109.4	110.2	77.4661	81.4228	2894	2138.27	3990.7	0.0265724	145.646	40.7	4.8	50.4	76.4	34.4	3.3	52607	0.35	63123654	2.27245e+08	420.314	1.03386e+09	2.30281e+08	1.26414e+09	n.a.	n.a.	1.63135e+06	10.8625	1.20534e+06	2.26441e+06	1.73488e+06	15.6346	38.8062	563.699	811.345	n.a.	499555	520442	9.49426	60	0.399515	Media
15109	Tultitlán	71.1	520557	513745	3567	3245	701529	737360	169.9	155.6	209.694	220.405	2651	3755.1	59703.1	0.114691	839.706	36.4	4.6	49.8	76.6	27.1	2.3	215555	0.41	883513526	3.18065e+09	1697.25	4.23621e+09	9.43565e+08	5.17977e+09	278.51	278.4	5.68418e+06	10.9194	8.05155e+06	1.5126e+07	1.15888e+07	15.7166	166.107	2144.16	3086.14	n.a.	1.73154e+06	1.81336e+06	9.54386	480	0.922089	Media
15112	Villa del Carbón	303.31	47151	0	17986	29165	62229.3	65407.7	18.8	21.6	28.5074	29.9634	1192	1653.54	676.7	0.0143518	2.23105	71.7	3.7	78.9	91.7	92.9	1.6	7956	0.16	13103529	4.71727e+07	277.906	1.56356e+08	3.48264e+07	1.91182e+08	n.a.	n.a.	307217	6.51559	426169	800621	613395	9.37803	160.605	257.732	370.959	n.a.	156840	98263.6	5.70964	25	0.530211	Alta
15120	Zumpango	244.08	199069	87712	84980	26377	232404	244275	35.6	45	52.5356	55.2188	4560	5595.51	3818.7	0.0191828	15.6453	46.9	4.2	58.7	74.7	41.1	2.2	67382	0.33	138237567	4.97655e+08	694.42	1.32423e+09	2.94956e+08	1.61919e+09	124.47	117.08	1.80503e+06	9.06734	2.21492e+06	4.16105e+06	3.18799e+06	13.0508	130.526	395.839	569.74	n.a.	662169	576292	7.93134	110	0.552572	Media
15121	Cuautitlán Izcalli	110.3	531041	520971	4225	5845	640247	672948	147.4	126.5	152.514	160.304	2122	2689.05	84441.4	0.159011	765.561	27.7	4.7	42.9	75.9	17.3	5	333822	0.62	1131361144	4.0729e+09	2130.46	6.56046e+09	1.46126e+09	8.02172e+09	269.46	75.02	5.78309e+06	10.8901	7.32847e+06	1.37676e+07	1.0548e+07	15.6744	138.066	2725.3	3922.58	n.a.	1.76642e+06	1.84494e+06	9.51832	200	0.376619	Baja
15122	Valle de Chalco Solidaridad	46.36	396157	394725	0	1432	480544	505088	146.9	158.7	192.505	202.338	3768	4804.09	5654.8	0.0142741	121.976	59	5	67.6	66.7	53.9	1.9	103160	0.26	129664395	4.66792e+08	327.306	2.02736e+09	4.5157e+08	2.47893e+09	338.21	169.11	4.33899e+06	10.9527	5.53209e+06	1.03928e+07	7.96246e+06	15.7645	139.522	1151.54	1657.43	n.a.	1.31775e+06	1.38421e+06	9.57284	500	1.26213	Alta
15125	Tonanitla	18.38	9728	0	9194	534	14954.7	15718.5	n.a	56.4	86.7028	91.1312	1067	1724.06	40.2	0.0041324	2.18716	49.6	4	60.6	72.3	60	1.8	2033	0.21	14532690	52317684	1493.9	3.99537e+07	8.8992e+06	4.88529e+07	n.a.	n.a.	78482.9	8.06773	126813	238236	182525	11.6121	203.552	73.5547	105.869	n.a.	32358.5	25071.7	7.06102	10	1.02796	Media
Sources:			INEGI, 2015	IGECEM, 2018	IGECEM, 2018	IGECEM, 2018	CONAPO, 2010	Estimated	CONAPO, 2004	Estimated	Estimated	Estimated	PCTU	Estimated	INEGI, 2019	Estimated	Estimated	CONEVAL, 2015	INEGI	INEGI	INEGI	INEGI	INEGI	INEGI	INEGI	CFE, 2018	CFE, 2018	CFE, 2018	SIE, 2018	SIE, 2018	SIE, 2018	CONAGUA, 2018	CONAGUA, 2018	Estimated	Estimated	Estimated	Estimated	Estimated	Estimated	Estimated	Estimated	Estimated	SEDEMA, 2018	SEDEMA, 2018	Estimated	Estimated	PCTU	Estimated	PCTU
			20893724					2.32653e+07																											9.47289				13.6345
Population, 2015:	INEGI. Encuesta intercensal 2015. Online: https://www.inegi.org.mx/programas/intercensal/2015/																																														Total (tons, year)	Per capita (kg, day)
Population by size, 2015:	* Data for the Sate of Mexico from the IGECEM's basic statistical data 2018. Online: https://igecem.edomex.gob.mx/sites/igecem.edomex.gob.mx/files/files/ArchivosPDF/Productos-Estadisticos/Indole-Social/EBM/Estadistica_Basica_Municipal_del_Estado_de_Mexico_2018_1raParte.zip																																													MSW 2015	23210.2	1.11087
	* Data for rural population in Mexico City based on the 2010 Population Census: https://www.inegi.org.mx/contenidos/programas/ccpv/2010/microdatos/cinco_mil_menos/resloc_09_2010_xls.zip																																													MSW 2050_p	25844.8	1.11087
	*Data for Tultepec population based on the Municipal Development Plan 2019 - 2021 Online: http://tultepec.gob.mx/pdf/2019/PDM%20Tultepec%202019-2021.pdf																																													MSW2050_p+$	48553.1	2.08693
	* Datafor Tizayuca population extrapolated, based on the municipal profile of 2010: Online: http://poblacion.hidalgo.gob.mx/pdf/perfiles/pp_municipios-Tizayuca.pdf																																													MSW 2050 average increase	37199	1.5989
Population 2030:	CONAPO. Proyecciones de la población de los municipios que componen las zonas metropolitanas, 2010 - 2030. Online: http://www.conapo.gob.mx/work/models/CONAPO/Resource/1206/2/images/Proyecciones_de_Poblacion_ZM.xlsx
Population 2050:	Estimation based on CONAPO's total population data for 2050 at a state level (the only available), and the weight of the population of each municipality in 2030 as projected by CONAPO, 2010. Population data 2050 available online: https://www.gob.mx/conapo/documentos/cuadernillos-estatales-de-las-proyecciones-de-la-poblacion-de-mexico-y-de-las-entidades-federativas-2016-2050-208243?idiom=es																																													Total	tons per capita, year	kg per capita, day
Average urban density:	Based on data for the year 2000 from CONAPO, 2004. Delimitación de las zonas metropolitanas de México. Online: http://www.conapo.gob.mx/work/models/CONAPO/zonas_metropolitanas2000/completo.pdf																																												GHG 2016	6.25535e+07	2.99389	8.20244
	* All other years projected on the basis of urban population growth data																																												GHG 2050_p	6.96539e+07	2.99389	8.20244
Residential density:	Based on data of INEGI (Encuesta Intercensal 2015, avilable online: www.inegi.org.mx/programas/intercensal/2015) adjusted with the latest data on built area, reported by local goverments. Taken from: https://transformacionurbana.mx/es/proyectos/interfaz_cp/diagnostico-zmvm/diagnostico-metropolitano/																																												GHG 2050_p+$	1.30855e+08	5.62446	15.4095
	* 2050 data is an estimation based on 2015 per capita residencial density and urban populationdata of 2050																																												GHG 2050 average increase	1.00254e+08	4.30917	11.806
Total GDP, 2018:	INEGI. Censos Económicos 2019. Online: https://www.inegi.org.mx/programas/ce/2019/#Datos_abiertos
GDP per capita 2018:	Estimation based on Total GDP 2018 and population data of 2015
Economic density:	Estimation based on Total GDP and administrative municipal area
Poverty:	CONEVAL. Medición de la pobreza, Estados Unidos Mexicanos. 2010-2015. Online: https://www.coneval.org.mx/Medicion/Documents/Pobreza_municipal/Concentrado_indicadores_de_pobreza.zip
Unemployment 2015:	INEGI. Data Bank. Porcentaje de la población de 12 años y más economicamente activa no ocupada, 2015. Online: https://www.inegi.org.mx/app/indicadores/
Education 2015:	INEGI. Data Bank. Porcentaje de la población de 15 años y más sin escolaridad y con escolaridad básica, 2015. Online: https://www.inegi.org.mx/app/indicadores/
Affiliation to health services, 2015:	INEGI. Data Bank. Porcentaje de la población afiliada a servicios de salud, 2015. Online: https://www.inegi.org.mx/app/indicadores/
	* Specific desagragated data by type of health service (private and popular isurance) corresponds to the same source
Vehicle fleet, 2019:	INEGI. Data Bank. Vehículos registrados en circulación, 2019. Online: https://www.inegi.org.mx/app/indicadores/
Electrical energy consumption, 2018:	CFE, 2019: Electrical energy consuption by municipality. Online: https://potcorporativo.cfe.mx/XXX%20Estadsticas%20generadas/Bases%20de%20datos%20respectivas/DCO/2019/2019_UsuariosyConsumoporMunicipio_Ene.zip
	* Conversion factors to joules based on SIE-SENER: https://www.conuee.gob.mx/transparencia/boletines/SITE/LISTA_DE_COMBUSTIBLES_2020.pdf
Pteroleum product sales, 2018:	Based on per capita sale volumes in 2018 of Azcapotzalco, Barranca del Muerto, Oriente and San Juan Ixhuatepec superintendencies, as reported by SENER. Online: http://sie.energia.gob.mx/bdiController.do?action=cuadro&subAction=applyOptions.
	Conversion factors to joules based on CONUEE: https://www.conuee.gob.mx/transparencia/boletines/SITE/LISTA_DE_COMBUSTIBLES_2020.pdf
Water endowment, 2018:	Based on data from local water operating agencies reported to CONAGUA. Personal communication. Online: https://drive.google.com/file/d/1CB9XhVtwyGckNUFnCindPPTGO4mYwTi9/view?usp=sharing
Water consumption, 2018:	Based on data from local water operating agencies reported to CONAGUA. Personal communication.
DMC (all years):	Estimations based on a methodology developed for UNEP's forthcoming report on "The weight of cities in Latin America and the Caribbean". Main components of such metodology are IRP's data on national DMC, an urban consumption proxy based on GDP and consumption patterns, and projections of population and economic growth (see Table 1).
Wastewater, 2015:	Based on locally reported volumes for the case of the conurbated municipalities (as indicated in Municipal Development Plans, 2019-2021). For Mexico City data corresponds to SEDEMA, 2018. Registro de descargas de aguas residuales de la CDMX 2015. Online: https://www.sedema.cdmx.gob.mx/storage/app/media/rdar-2015publicacionn
CO2 emissions, 2016:	Estimation based on per capita emissions for 2016 as reported by SEDEMA (total CO2e emissions for Mexico City were 22,005,070 tons; for the State of Mexico 39,435,714 tons; and for Tizayuca 874,297 tons). SEDEMA. 2018. Inventario de emissiones 2016. Online: http://www.aire.cdmx.gob.mx/descargas/publicaciones/flippingbook/inventario-emisiones-2016/mobile/
	* Adjusted emissions asumming 75% and 50% less emissions for mixed and rural population, respectively, in relation to urban population average emissions. See table 2 bellow.
	* CO2 per capita emissions were calculated with population data of 2015 and adjusted CO2 emissions.
Municipal solid waste, 2014:	Based on data reported by the regional programs of the State of Mexico 2017-2023, and the government of Mexico City (SEDEMA, 2017. Inventario de Residuos Sólidos CDMX. Online: https://www.sedema.cdmx.gob.mx/storage/app/media/IRS_2017_FINAL_BAJA.pdf). Taken from PCTU: https://transformacionurbana.mx/en/projects/interface_sp/assessment_gov/metro/
Climate vulnerability:	As reported by local climate change action plans of Mexico City (Online: http://www.data.sedema.cdmx.gob.mx/cambioclimaticocdmx/programas_accion_climatica_delegaciones.html) and the State of Mexico's Climate Change Action Program 2018 (Online: https://drive.google.com/file/d/1Dq8JVKnYS9sFjwe70QAXfwH5QFm9Yff1/view?usp=sharing)
Local climate environmental institutional capacities, 2019:	ICI-CLIMA, 2019. As reported by the Knowledge Platform for Urban Transformation. Available at: https://zenodo.org/record/3984235/files/ICI-CLIMA%202019.pdf?download=1
COVID-19 :	All data based on official information availabe at: https://datos.covid-19.conacyt.mx/
Table 1. Real GDP per cápita (USD ppp), as projected by the OECD
Year	2015	2016	2017	2018	2019	2020	2021	2022	2023	2024	2025	2026	2027	2028	2029	2030	2031	2032	2033	2034	2035	2036	2037	2038	2039	2040	2041	2042	2043	2044	2045	2046	2047	2048	2049	2050	0.878644	Accumulated GDP growth by 2050
Ammount	16670	16937	17105	17315	17595	16380.6	16626.3	17617.2	18608	18924	19255	19600	19960	20333	20720	21121	21534	21960	22398	22848	23310	23783	24267	24763	25268	25784	26307	26839	27378	27923	28474	29030	29592	30160	30735	31317	0.0183381	Average increase per year
Annual rate growth (%)		0.0160168	0.00991911	0.0122771	0.016171	-0.0690196	0.015	0.059595	0.0562432	0.0169819	0.017491	0.0179174	0.0183673	0.0186874	0.0190331	0.0193533	0.019554	0.0197827	0.0199454	0.0200911	0.0202206	0.0202917	0.0203507	0.0204393	0.0203933	0.0204211	0.0202839	0.0202228	0.0200827	0.0199065	0.0197328	0.0195266	0.0193593	0.0191944	0.019065	0.0189361
Table 2. CO2e estimations, 2015
Average CO2 emissions	Total	Per capita urban	Per capita mixed	Per capita rural
CO2e per capita Mexico City= 2.46730868	2.19209e+07	2.47425	1.85569	1.23713
CO2e per capita State of Mexico= 3.32632828	3.55631e+07	3.50041	2.62531	1.75021
CO2e per capita Tizayuca=7.31984562	647594	8.59402	6.44552	4.29701
WF of the MVMA (millions of m3, yearly)
Total national urban WF (2015)	Total national urban consumption WF_inflows (2015)	Total national urban consumption WF_outflows (2015)	Total MVMA WF (2015)	Total MVMA consumption WF_inflows (2015)	Total MVMA consumption WF_outflows (2015)	Total MVMA WF_p (2050)	Total MVMA consumption WF_p inflows (2050)	Total MVMA consumption WF_p outflows (2050)	Total MVMA WF_p+$ (2050)	Total MVMA consumption WF_p+$ inflows (2050)	Total MVMA consumption WF_p+$ outflows (2050)
221115	204930	16184.8	46285.8	42897.9	3387.95	51539.7	47767.2	3772.51	58671.6	54377.1	4294.54
Total Agricultural urban WF (2015)	Total Industrial WF (2015)	Total urban domestic WF (2015)	MVMA Agricultural urban WF (2015)	MVMA Industrial WF (2015)	MVMA urban domestic WF (2015)	Total Agricultural urban WF_p+$ (2050)	Total Industrial WF_p+$ (2050)	Total urban domestic WF_p+$ (2050)
202792	6737.83	11585.6	42450.2	1410.43	2425.21	50647.9	2950.45	5073.27
			Total MVAM WF, 2015 (m3, day)	6.06931		Total MVAM WF_p+$, 2050 (m3, day)	6.90917		Total MVAM average WF, 2050 (m3, day)	6.48924
[truncated: 5 more columns]

## Sheet: Mexico data
DMC Estimations
	2015						2035						2050							DMC 2050
	Urban					Rural	Urban					Rural	Urban					Rural		Urban					Rural	Total
	< 500 thousand	500 thousand to 1 million	1 - 5 millions	5 -10 millions	> 10 millions		< 500 thousand	500 thousand to 1 million	1 - 5 millions	5 -10 millions	> 10 millions		< 500 thousand	500 thousand to 1 million	1 - 5 millions	5 -10 millions	> 10 millions			< 500 thousand	500 thousand to 1 million	1 - 5 millions	5 -10 millions	> 10 millions
Population (inhabitants)	3.65566e+07	1.61204e+07	2.6402e+07	-	2.15785e+07	2.6275e+07	4.33162e+07	1.08673e+07	3.7959e+07	1.22448e+07	2.54081e+07	2.32652e+07	4.56401e+07	4.52918e+06	4.54347e+07	2.27642e+07	2.65426e+07	1.93685e+07		4.29426e+06	4.51998e+07	2.25293e+07	2.63077e+07	1.91336e+07	1.93685e+07
Population (%)	28.8	12.7	20.8	0	17	20.7	28.3	7.1	24.8	8	16.6	15.2	27.78	2.76	27.66	13.86	16.16	11.79		2.61	27.51	13.71	16.01	11.65	11.79
Built area (km2)	3920.31	1728.75	2831.33	-	2314.07	3740.27	4712.79	1182.36	4129.94	1332.24	2764.39	3139.38	4965.28	493.31	4943.83	2477.28	2888.37	2613.58	DMC	88.52	931.73	464.41	542.3	394.41	198.86	2620.23
					10794.5												15768.1							2421.38
																								92.4107	%
					2015-2035 tendency:		-0.125	-1.4	1	2	-0.1													16.7095	DMC per cap
		2015				2035				2050
		Urban centre	Urban cluster	Rural	TOTAL	Urban centre	Urban cluster	Rural	TOTAL	Urban centre	Urban cluster	Rural	TOTAL								National DMC estimations 2015 and 2050
	Population	72432704	26780508	27719365	126932577	9.47592e+07	3.50353e+07	23266104	153060606	1.05795e+08	3.91154e+07	19369368	164279302									DMC 2015	DMC 2050 (p)	DMC 2050 (p+$)
	Built area	7223.4	3571.06	3740.27	14534.7	9449.93	4671.8	3139.38	17261.1	10550.4	5215.86	2613.58	18379.9								Urban	1095.2	1590.04	2421.38
																					Rural	142.5	105.9	198.86
																						1237.7	1695.9	2620.23
Year		Population, 2015	Population, 2035	Population, 2050	Built area, 2015	Built area, 2035	Built area, 2050
Urban	< 500 thousand	36556582	43316151	45640076	3920	4713	4965
	500 thousand to 1 million	16120437	10867303	4529180	1729	1182	493
	1 – 5 millions	26401976	37959030	45434727	2831	4130	4944
	5 – 10 milions	-	12244848	22764183	-	1332	2477
	> 10 millions	21578538	25408061	26542607	2314	2764	2888
Rural		26275043	23265212	19368530	3740	3139	2614
TOTAL		126932577	153060606	164279302	14535	17261	18382
																						Urban DMC 2015 and 2050							National DMC composition 2015
																							DMC_u 2015	DMC_u 2050 (p)	DMC_u 2050 (average)	DMC_u 2050 (p+$)			Biomass	4.12299e+08	33.3109
																						Biomass	364.821	529.657	668.12	806.584			Fossil fuels	1.67091e+08	13.4998
																						Fossil fuels	147.85	214.652	270.767	326.882			Metal ores	3.04456e+08	24.598
																						Metal ores	269.397	391.118	493.364	595.611			Non-metallic minerals	3.53883e+08	28.5913
																						Non-metallic minerals	313.132	454.613	573.458	692.304			Total	1.23773e+09	100
																						Total	1095.2	1590.04	2005.71	2421.38
Urban Water Footprint estimation for Mexico's urban system
(millions of m3, yearly)
Total Agricultural urban WF (2015)	Total Industrial Urban WF (2015)	Total Domestic urban WF (2015)	Total urban WF (2015)	Total urban consumption WF_inflows (2015)	Total urban consumption WF_outflows (2015)		Total Agricultural urban WF (2050_p)	Total Industrial Urban WF (2050_p)	Total Domestic urban WF (2050_p)	Total urban WF (2050_p)	Total urban consumption WF_inflows (2050_p)	Total urban consumption WF_outflows (2050_p)		Total Agricultural urban WF (2050_p+$)	Total Industrial Urban WF (2050_p+$)	Total Domestic urban WF (2050_p+$)	Total urban WF (2050_p+$)
202792	6737.83	11585.6	221115	204930	16184.8		294417	9782.11	16820.2	321019	297521	23497.4		315464	18377.1	31599.2	365441
Based on Water Footprint National Accounts (https://waterfootprint.org/media/downloads/Report50-Appendix-VIII&IX.xls) and Mexico's factor U.														* FAO estimates 9 million undernourished population in Mexico or 7.14904453 % of 2015 total population.
Waste generation in Mexico's cities
Total Population, 2015	Total MSW generated, 2010 - What a Waste 2.0 (tons, year)	Factor U (2015)	Estimation of urban MSW, 2015 (tons, year)	Per cápita urban MSW, 2015 (tons, year)	Estimation of urban MSW, 2050_p (tons, year)	Estimation of urban MSW, 2050_p+$ (tons, year)
125890949	53100000	88.4852	4.69856e+07	0.470738	6.82146e+07	1.28151e+08
Based on national data of the World Bank (https://development-data-hub-s3-public.s3.amazonaws.com/ddhfiles/140602/country_level_data_0.csv) and Mexico`s factor U.
Mexico's urban GHG estimations
National GHG per capita emissions, 2015	Total GHG emissions, 2015	Total urban GHG emissions, 2015	Total urban GHG emissions_p, 2015	Total urban GHG emissions_p+$, 2015
3.963	4.98906e+08	4.41458e+08	6.40917e+08	1.20405e+09
Based on data of the World Bank (https://data.worldbank.org/indicator/EN.ATM.CO2E.PC) and Mexico's factor U
Real per capita GDP forecast (USD ppp), según la OECD
Year	2015	2016	2017	2018	2019	2020	2021	2022	2023	2024	2025	2026	2027	2028	2029	2030	2031	2032	2033	2034	2035	2036	2037	2038	2039	2040	2041	2042	2043	2044	2045	2046	2047	2048	2049	2050
Amount	16670	16937	17105	17315	17595	16380.6	16626.3	17617.2	18608	18924	19255	19600	19960	20333	20720	21121	21534	21960	22398	22848	23310	23783	24267	24763	25268	25784	26307	26839	27378	27923	28474	29030	29592	30160	30735	31317
Annual rate growth		0.0160168	0.00991911	0.0122771	0.0161709	-0.0690196	0.015	0.059595	0.0562432	0.0169819	0.017491	0.0179174	0.0183673	0.0186874	0.0190331	0.0193533	0.019554	0.0197827	0.0199454	0.0200911	0.0202206	0.0202917	0.0203507	0.0204393	0.0203933	0.0204211	0.0202839	0.0202228	0.0200827	0.0199065	0.0197328	0.0195266	0.0193593	0.0191944	0.019065	0.0189361	0.878644	(expecte per capita GDP growth for the analyzed period)
* COVID-19 impact adjustment																																			0.0183381	(GDP average growth rate)

## Sheet: Factor U_Mexico
Original data from the National Survey on Household Income and Expenditures 2016 (https://www.inegi.org.mx/programas/enigh/nc/2016/)
INEGI. Encuesta Nacional de Ingresos y Gastos de los Hogares. ENIGH 2016. Tabulados básicos. 2017.						31.2573
HOGARES POR LA COMPOSICIÓN DE LOS GRANDES RUBROS DEL GASTO CORRIENTE MONETARIO TRIMESTRAL SEGÚN TAMAÑO DE LOCALIDAD (Miles de pesos*)									CUADRO 4.1
COMPOSICIÓN DE LOS GRANDES RUBROS DEL GASTO					TAMAÑO DE LOCALIDAD
		TOTAL			DE 2 500 Y MÁS HABITANTES			DE MENOS DE 2 500 HABITANTES			Urban spending (% of the total):	86.8901
		HOGARES1	GASTO		HOGARES1	GASTO		HOGARES1	GASTO		Rural spending (% of the total):	13.1099
GASTO CORRIENTE MONETARIO		33442993	9.4175e+08		26179100	8.18287e+08		7263893	1.23463e+08		Factor U (%):	88.4852
ALIMENTOS, BEBIDAS Y TABACO		33298772	3.31486e+08		26080716	2.7978e+08		7218056	5.17064e+07		Factor R (%):	11.5148
ALIMENTOS Y BEBIDAS CONSUMIDAS DENTRO DEL HOGAR		33117319	2.57151e+08		25920354	2.12237e+08		7196965	4.49137e+07
ALIMENTOS Y BEBIDAS CONSUMIDAS FUERA DEL HOGAR		16724342	7.24517e+07		13899468	6.58675e+07		2824874	6.58423e+06
TABACO		1867604	1.88342e+06		1601940	1.675e+06		265664	208421
VESTIDO Y CALZADO		25375621	4.35826e+07		19825466	3.71924e+07		5550155	6.3902e+06
VESTIDO		21176778	2.68027e+07		16660521	2.31248e+07		4516257	3.6779e+06
CALZADO Y SU REPARACIÓN		19883605	1.67799e+07		15331510	1.40676e+07		4552095	2.71231e+06
VIVIENDA Y SERVICIOS DE CONSERVACIÓN, ENERGÍA ELÉCTRICA Y COMBUSTIBLES		32682025	8.9351e+07		25773026	8.18979e+07		6908999	7.45315e+06
ALQUILERES BRUTOS		4743905	3.26273e+07		4542052	3.20031e+07		201853	624139
IMPUESTO PREDIAL Y CUOTAS POR SERVICIOS DE CONSERVACIÓN		15551382	7.29965e+06		13777003	7.00319e+06		1774379	296455
AGUA		23132098	1.01907e+07		19040007	9.24793e+06		4092091	942782
ELECTRICIDAD Y COMBUSTIBLES		31796533	3.92334e+07		25055140	3.36436e+07		6741393	5.58977e+06
ARTÍCULOS Y SERVICIOS PARA LA LIMPIEZA, CUIDADOS DE LA CASA, ENSERES DOMÉSTICOS Y MUEBLES, CRISTALERÍA, UTENSILIOS DOMÉSTICOS Y BLANCOS		32953341	5.55774e+07		25807562	4.77441e+07		7145779	7.83335e+06
ARTÍCULOS Y SERVICIOS PARA LA LIMPIEZA Y CUIDADOS DE LA CASA		32830600	4.20441e+07		25715294	3.62004e+07		7115306	5.84365e+06
CRISTALERÍA, BLANCOS Y UTENSILIOS DOMÉSTICOS		7951767	4.64337e+06		6002580	3.93182e+06		1949187	711550
ENSERES DOMÉSTICOS		7160985	8.88997e+06		5762126	7.61182e+06		1398859	1.27815e+06
CUIDADOS DE LA SALUD		18390165	2.54241e+07		14410838	2.13959e+07		3979327	4.02818e+06
TRANSPORTE; ADQUISICIÓN, MANTENIMIENTO, ACCESORIOS Y SERVICIOS PARA VEHÍCULOS; COMUNICACIONES		31557734	1.82174e+08		25165879	1.59766e+08		6391855	2.24089e+07
TRANSPORTE PÚBLICO		20352976	4.91425e+07		16326459	4.07963e+07		4026517	8.34618e+06
TRANSPORTE FORÁNEO		5676793	6.9257e+06		4389923	6.07926e+06		1286870	846440
ADQUISICIÓN DE VEHÍCULOS DE USO PARTICULAR		1160577	2.31296e+07		980881	2.07166e+07		179696	2.41305e+06
REFACCIONES, PARTES, ACCESORIOS, MANTENIMIENTO,COMBUSTIBLES Y SERVICIO PARA VEHÍCULOS		14541958	6.15688e+07		12048338	5.42663e+07		2493620	7.30252e+06
COMUNICACIONES		27758167	4.14077e+07		22884066	3.79071e+07		4874101	3.50067e+06
SERVICIOS DE EDUCACIÓN, ARTÍCULOS EDUCATIVOS, ARTÍCULOS DE ESPARCIMIENTO Y OTROS GASTOS DE ESPARCIMIENTO		24075271	1.1694e+08		19278046	1.05841e+08		4797225	1.10986e+07
ARTÍCULOS Y SERVICIOS DE EDUCACIÓN		15267881	8.13671e+07		12105428	7.34538e+07		3162453	7.91337e+06
ARTÍCULOS Y SERVICIOS DE ESPARCIMIENTO		17229952	2.5784e+07		14046626	2.32841e+07		3183326	2.49989e+06
PAQUETES TURÍSTICOS Y PARA FIESTAS, HOSPEDAJE Y ALOJAMIENTO		2274397	9.78872e+06		1960503	9.10335e+06		313894	685373
CUIDADOS PERSONALES, ACCESORIOS Y EFECTOS PERSONALES Y OTROS GASTOS DIVERSOS		33116513	6.96564e+07		25943575	6.00965e+07		7172938	9.55995e+06
CUIDADOS PERSONALES		33018394	5.16763e+07		25865024	4.39835e+07		7153370	7.69279e+06
ACCESORIOS Y EFECTOS PERSONALES		7120831	3.09127e+06		5587432	2.7059e+06		1533399	385364
OTROS GASTOS DIVERSOS		8412130	1.48889e+07		6859293	1.34071e+07		1552837	1.48179e+06
TRANSFERENCIAS DE GASTO		10919275	2.75585e+07		8785377	2.45743e+07		2133898	2.98422e+06
Nota: Las estimaciones que aparecen en este cuadro están coloreadas de acuerdo con su nivel de precisión, en Alta, Moderada y Baja, tomando como referencia el coeficiente de variación CV (%). Una precisión Baja requiere un uso cauteloso de la estimación en el que se analicen las causas de la alta variabilidad y se consideren otros indicadores de precisión y confiabilidad, como el intervalo de con…
Nivel de precisión de las estimaciones:
Alta, CV en el rango de (0,15)
Moderada, CV en el rango de [15,30)
Baja, CV de 30% en adelante
* Los datos son expresados en miles de pesos, motivo por el cual se puede encontrar una diferencia en las cifras totales por cuestiones de redondeo.
1	Se incluye el total de hogares que reportaron gasto corriente monetario trimestral durante el periodo de referencia
Fuente: INEGI. Encuesta Nacional de Ingresos y Gastos de los Hogares 2016.
year	2005	2006	2007	2008	2009	2010	2011	2012	2013	2014	2015	2016	2017	Average of the period
Rural GDP	10.4932	10.7197	11.1557	11.7445	9.7386	10.4138	11.8186	11.343	10.226	9.71454	7.13808	6.97073	7.47893	9.91964
Urban GDP	89.5068	89.2803	88.8443	88.2555	90.2614	89.5862	88.1814	88.657	89.774	90.2855	92.8619	93.0293	92.5211	90.0804
GDP data from CEPALSTAT. Rural GDP is the addition of primary economic activities + extractive activities. Urban GDP is the total Secondary and tertiary activities minus extractive activities (oil and minerals)
